# Supplementary material
Source: publisher figshare collection journal article supplement (https://tandf.figshare.com/ndownloader/files/14740187)

**Supplemental material**

First package of control measures (April-May 2016)

30th of April, 2016: clarifying session at the SICU for clinicians and nurses about the importance of *C. Auris* and control measures to be implemented.

From the 1rst of May 2016, there was the application of the following control measures:

- Precaution measures for the contact of *C. auris* colonized or infected patients during the whole stay at the hospital;

- Weekly surveillance cultures (urine, rectal swab, oropharyngeal swab) in all the SICU patients to detect early colonization;

- Decolonization of colonised patients with disposable chlorhexidine towels;

- Patient follow up outside the SICU until discharge or decolonization with *C. auris*.

After the publication of guidelines from PHE in June 2016, it was decided to use antifungal drugs when manipulating central ways and to use chlorhexidine in patient’s personal containers.

Second package of control measures (October 2016)

- Surface cleaning with disposable chlorhexidine towels;

- Isolation of patient’s cohorts infected/colonized by *C. auris* in the Box 1, from beds 1 to 8, with exclusive personnel for those patients. Contact precaution measures for all the patients in the cohort;

- Use of disposable chlorhexidine towels prior to intravenous catheter manipulation;

- One nurse was assigned to implement the control measures by all the personnel who has contact with the patients;

- Contact precaution measures in patients with yeast growth in any sample because the identification of *C. auris* is fastidious and can take around seven days;

- Weekly informative session to nurses, radiology technicians, caretakers and SICU clinicians;

- Weekly report on the compliance of hand hygiene of the sanitary personnel of SICU.

- Exhaustive follow-up of patients colonised by *C. auris* before and after surgery.

**Supplemental Figure 1.** MIC distributions of antifungal agents at 24 hours ((white bar) and 48 hours (black bar)


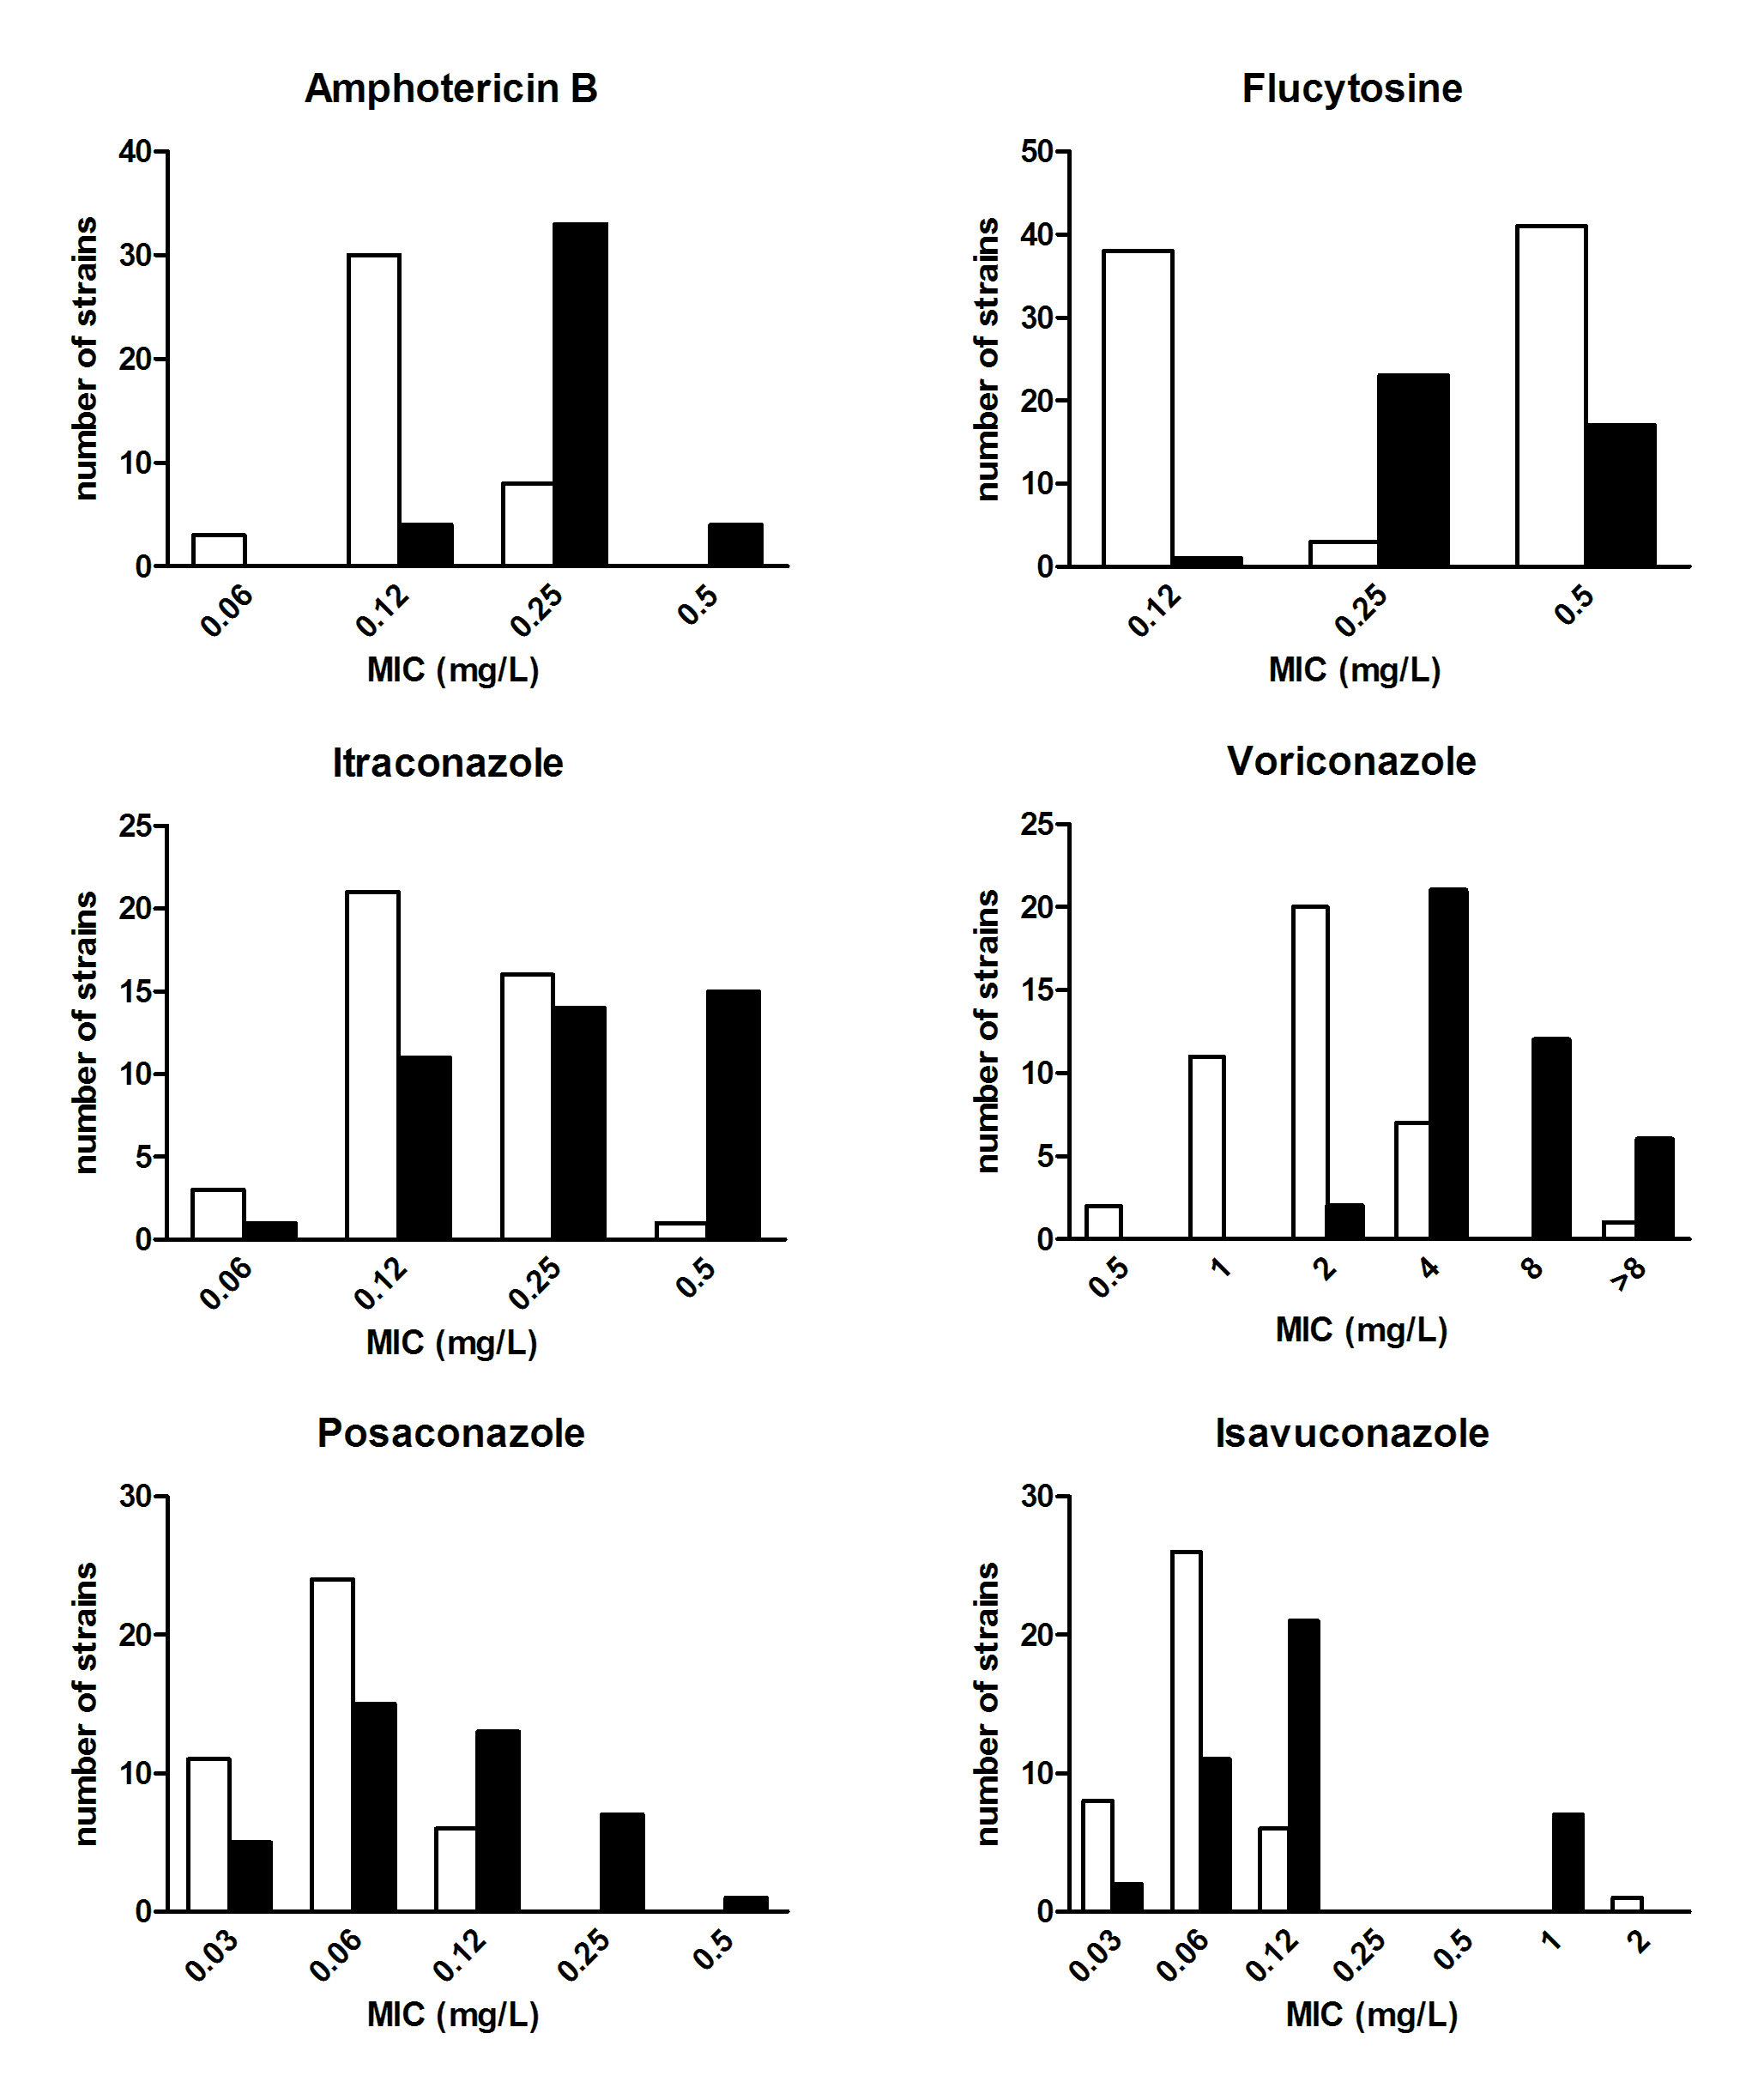

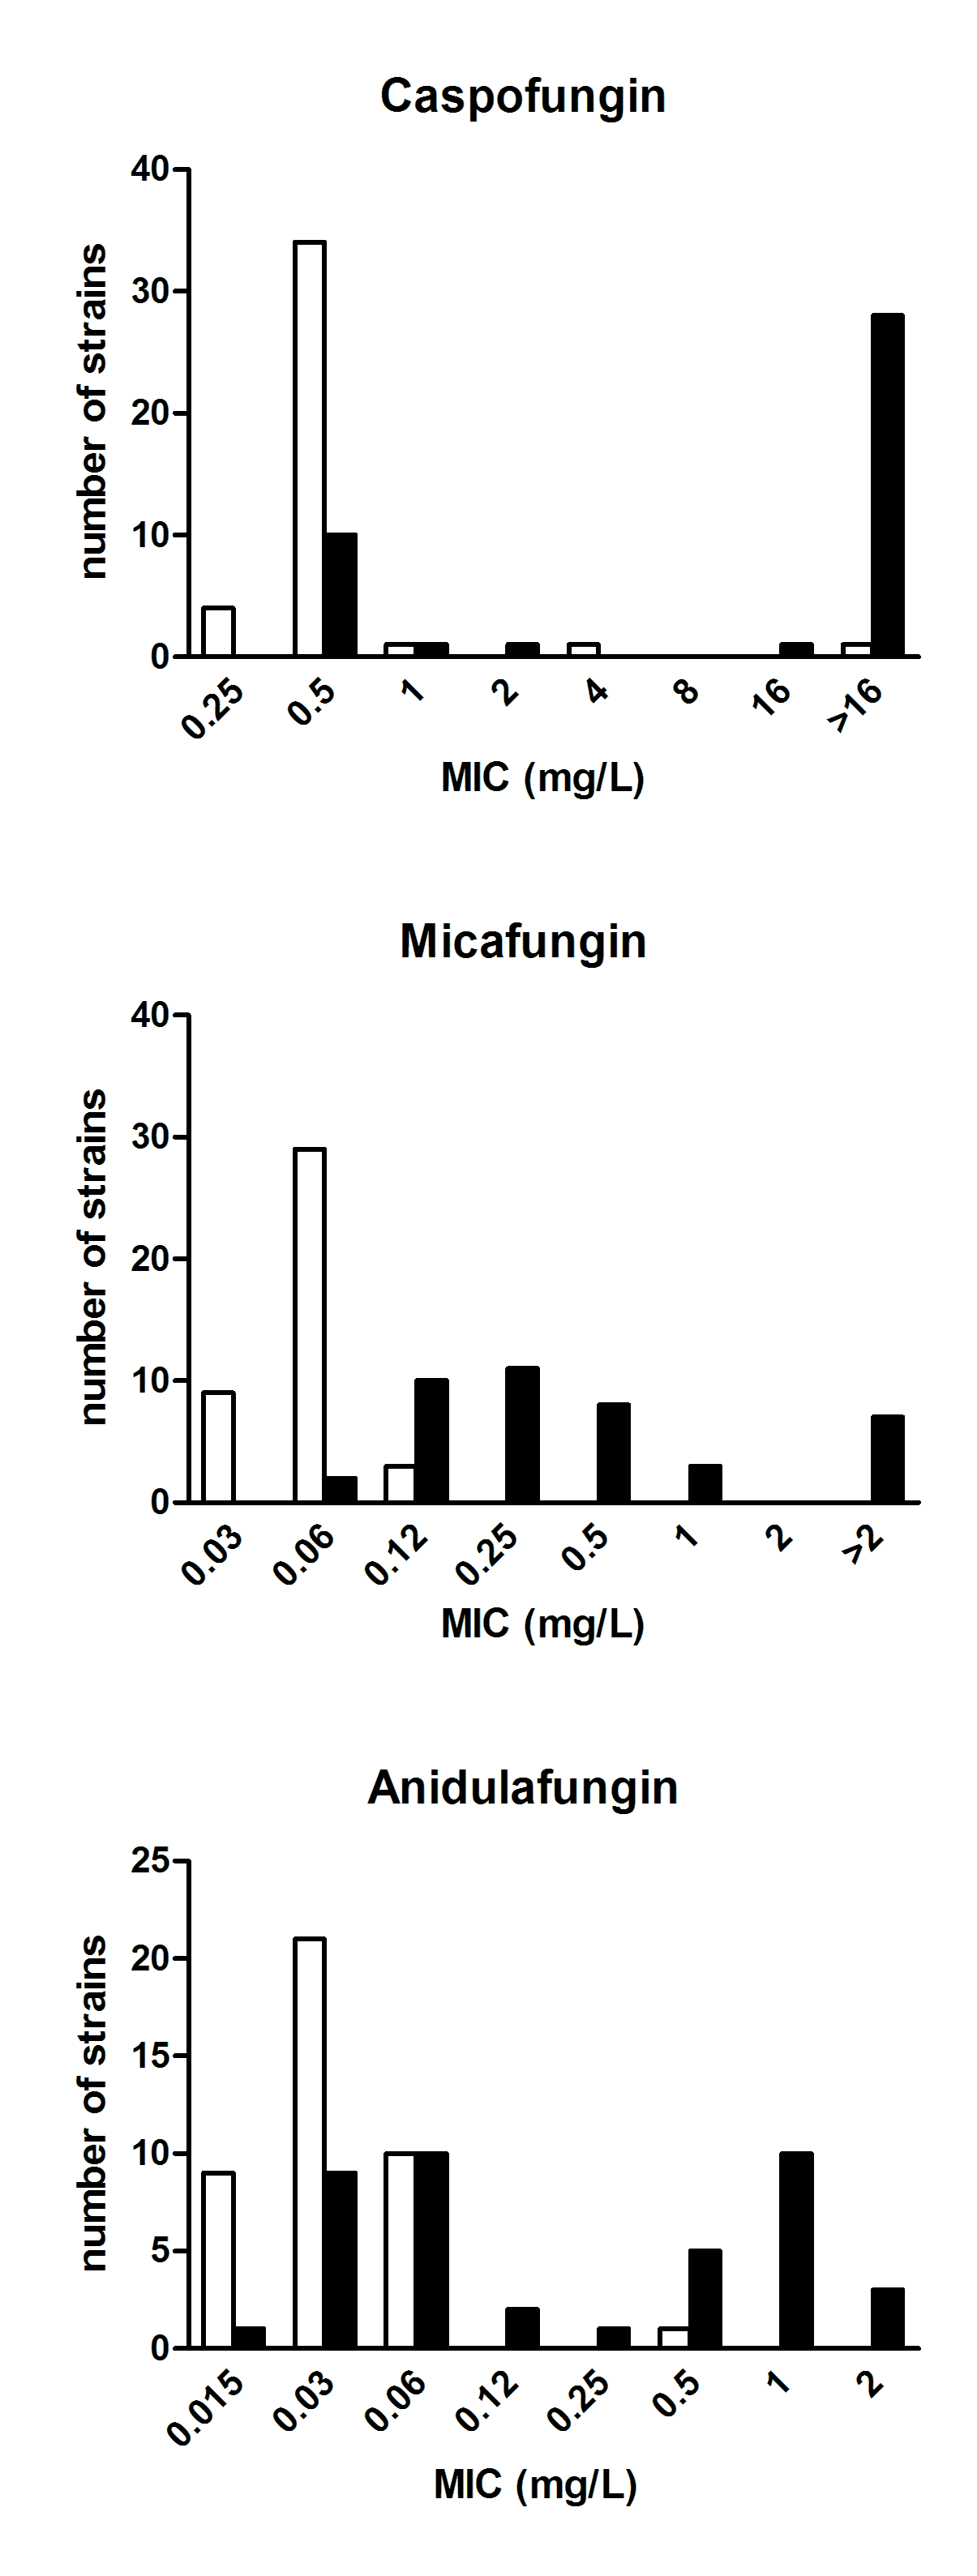

Supplement: Supplementary file 1 [file 14740187]
